# Supplementary material for: A Family of Toxoplasma gondii Genes Related to GRA12 Regulate Cyst Burdens and Cyst Reactivation
Source: PubMed Central journal article supplement (PMC8546695; doi:10.1128/msphere.00182-21), 2021-04-21
Supplement: msphere.00182-21-st001.pdf [file msphere.00182-21-st001.pdf]

**Table S1. Primers used to construct *GRA* knockouts and complementations.**

| Primer          | Primer Sequence                                                                                                                                 | Primer Use                 | KO Construct  | Corresponding TGME49 locus                  |
|-----------------|-------------------------------------------------------------------------------------------------------------------------------------------------|----------------------------|---------------|---------------------------------------------|
| <b>GRA12AF1</b> | TTGGGTAACGCCAGGGTTTTCCAGTCACGACGCTCTAGACACGATACGCTGTGGTGGGTC                                                                                    | Pru GRA12A KO 5' target FP | pRS416.GRA12A | TGME49_220890 chrII 37,902 to 41,699 (-)    |
| <b>GRA12AR1</b> | GCGGGTTTGAATGCAAGGTTTCGTGCTGATCAAGTTTAAACGCTCGCTAGAGCGTTTACCGTAACC                                                                              | Pru GRA12A KO 5' target RP |               |                                             |
| <b>GRA12AF2</b> | TTCTGGCAGGCTACAGTGACACCGCGGTGGAGGGTTTAAACGGAAGCCGGTGTGGATTGGTC                                                                                  | Pru GRA12A KO 3' target FP |               |                                             |
| <b>GRA12AR2</b> | GTGAGCGGATAACAATTTACACACAGGAAACAGCGCGGCCGCGCACACCACTTCTTAAGTCCAC                                                                                | Pru GRA12A KO 3' target RP |               |                                             |
| <b>GRA12BF1</b> | TTGGGTAACGCCAGGGTTTTCCAGTCACGACGACTAGTGGCTCAGCGTCACGTGAGAAG                                                                                     | Pru GRA12B KO 5' target FP | pRS416.GRA12B | TGME49_275860 chrIII 180,806 to 184,525 (+) |
| <b>GRA12BR1</b> | GCGGGTTTGAATGCAAGGTTTCGTGCTGATCAAGTTTAAACCTGCGAGCGCACTAAGCTCTG                                                                                  | Pru GRA12B KO 5' target RP |               |                                             |
| <b>GRA12BF2</b> | TTCTGGCAGGCTACAGTGACACCGCGGTGGAGGGTTTAAACCTCACAGATCCTGTAATACTGCGCTCC                                                                            | Pru GRA12B KO 3' target FP |               |                                             |
| <b>GRA12BR2</b> | GTGAGCGGATAACAATTTACACACAGGAAACAGCAITTTAAATGTCCTCCACTGGTGAGCACGTTTC                                                                             | Pru GRA12B KO 3' target RP |               |                                             |
| <b>GRA12CF1</b> | TTGGGTAACGCCAGGGTTTTCCAGTCACGACGACTAGTGAACGCTGCTCACCAGTGGGAC                                                                                    | Pru GRA12C KO 5' target FP | pRS416.GRA12C | TGME49_275850 chrIII 185,445 to 189,438 (+) |
| <b>GRA12CR1</b> | GCGGGTTTGAATGCAAGGTTTCGTGCTGATCAAGTTTAAACCATGCTTGCACCTCTTAGGCGAG                                                                                | Pru GRA12C KO 5' target RP |               |                                             |
| <b>GRA12CF2</b> | TTCTGGCAGGCTACAGTGACACCGCGGTGGAGGGTTTAAACAGCATGTTCCAGTGGGTGAAGC                                                                                 | Pru GRA12C KO 3' target FP |               |                                             |
| <b>GRA12CR2</b> | GTGAGCGGATAACAATTTACACACAGGAAACAGCAITTTAAATCTTCCGTTTCGATGCCGGTCTC                                                                               | Pru GRA12C KO 3' target RP |               |                                             |
| <b>GRA12DF1</b> | TTGGGTAACGCCAGGGTTTTCCAGTCACGACGATTTTAAATGATCTTGGCCGGTACACAC                                                                                    | Pru GRA12D KO 5' target FP | pRS416.GRA12D | TGME49_308970 chrXI 408,907 to 412,526 (+)  |
| <b>GRA12DR1</b> | GCGGGTTTGAATGCAAGGTTTCGTGCTGATCAAGTTTAAACCGGTCAACGGATGCGTGACC                                                                                   | Pru GRA12D KO 5' target RP |               |                                             |
| <b>GRA12DF2</b> | TTCTGGCAGGCTACAGTGACACCGCGGTGGAGGGTTTAAACCATGACTATGTCATTGCGAGGTACCG                                                                             | Pru GRA12D KO 3' target FP |               |                                             |
| <b>GRA12DR2</b> | GTGAGCGGATAACAATTTACACACAGGAAACAGCGCGGCCGCGCAGTCATCATGGGGAATTGTGATGGC                                                                           | Pru GRA12D KO 3' target RP |               |                                             |
| <b>GRA12AF1</b> | TTGGGTAACGCCAGGGTTTTCCAGTCACGACGCTCTAGACACGATACGCTGTGGTGGGTC                                                                                    | Pru GRA12A 5'target FP     | pRS416.GRA12A | TGME49_220890 chrII 37,902 to 41,699 (-)    |
| <b>GRA12AR4</b> | TCACTTGTGCTGCTGCTCCTTGTAGTCAGCGTAATCTGGAACATCGTATGGGTAAGCGTAATCTGG<br>AACATCGTATGGGTAAGCGTAATCTGGAACATCGTATGGGTAAGAACCTTTTCTGGATTCAAAT<br>GCCCT | Pru GRA12A coding+tag RP   |               |                                             |
| <b>GRA12AF4</b> | CGCTGACTACAAGGACGACGACGACAAGTGACGCTGCATCGTAGATGGCAC                                                                                             | Pru GRA12A coding+tag FP   |               |                                             |
| <b>GRA12AR2</b> | GTGAGCGGATAACAATTTACACACAGGAAACAGCGCGGCCGCGCACACCACTTCTTAAGTCCAC                                                                                | Pru GRA12A 3'target RP     |               |                                             |
| <b>GRA12BF1</b> | TTGGGTAACGCCAGGGTTTTCCAGTCACGACGACTAGTGGCTCAGCGTCACGTGAGAAG                                                                                     | Pru GRA12B 5'target FP     | pRS416.GRA12B | TGME49_275860 chrIII 180,806 to 184,525 (+) |
| <b>GRA12BR4</b> | TTACTTGTGCTGCTGCTCCTTGTAGTCAGCGTAATCTGGAACATCGTATGGGTAAGCGTAATCTGGA<br>ACATCGTATGGGTAAGCGTAATCTGGAACATCGTATGGGTAAGCTTCTAGCAGCTTCAACGTAGG        | Pru GRA12B coding+tag RP   |               |                                             |
| <b>GRA12BF4</b> | CGCTGACTACAAGGACGACGACGACAAGTAAGGAGGCGCCTAGGGGTTG                                                                                               | Pru GRA12B coding+tag FP   |               |                                             |
| <b>GRA12BR2</b> | GTGAGCGGATAACAATTTACACACAGGAAACAGCAITTTAAATGTCCTCCACTGGTGAGCACGTTTC                                                                             | Pru GRA12B 3'target RP     |               |                                             |

**Table S1. Primers used to construct *GRA* knockouts and complementations.**

| Primer          | Sequence                                                                                                                                                         | Primer Use               | KO Construct  | TGME49 Replacement Locus                           |
|-----------------|------------------------------------------------------------------------------------------------------------------------------------------------------------------|--------------------------|---------------|----------------------------------------------------|
| <b>GRA12CF1</b> | <i>TTGGGTAACGCCAGGGTTTTCCAGTCACGACGACTAGTGAACCGTGCTCACCAGTGGGAC</i>                                                                                              | Pru GRA12C 5'target FP   | pRS416.GRA12C | <b>TGME49_275850 chrIII 185,445 to 189,438 (+)</b> |
| <b>GRA12CR3</b> | <b>GAGA</b> ACTTGGGGCTGTCTGCC                                                                                                                                    | Pru GRA12C coding RP     |               |                                                    |
| <b>GRA12CDF</b> | <b>GTGTTCCGGTACATATGGCAGACAGC</b>                                                                                                                                | Pru GRA12C coding FP     |               |                                                    |
| <b>GRA12CR4</b> | CTACTTGTCGTCGTCGTCCTTGTAGTCAGCGTAATCTGGAACATCGTATGGGTAAGCGTAATCTGG<br>AACATCGTATGGGTAAGCGTAATCTGGAACATCGTATGGGTA <b>CTTCTTTTGTGAAGGTTTCATGAA</b><br><b>CGTCG</b> | Pru GRA12C coding+tag RP |               |                                                    |
| <b>GRA12CF4</b> | CGCTGACTACAAGGACGACGACGACAAGT <b>AGGAAGCTGTGCACGCGG</b>                                                                                                          | Pru GRA12C coding+tag FP |               |                                                    |
| <b>GRA12CR2</b> | <i>GTGAGCGGATAACAATTTACACAGGAAACAGCA</i> <u>TTTTAAATCTTCCGTTTCGATGCCGGTCTC</u>                                                                                   | Pru GRA12C 3'target RP   |               |                                                    |
| <b>GRA12DF1</b> | <i>TTGGGTAACGCCAGGGTTTTCCAGTCACGACGCA</i> <u>TTTTAAATGATCTTGCGGCCGGTACACAC</u>                                                                                   | Pru GRA12D 5'target FP   | pRS416.GRA12D | <b>TGME49_308970 chrXI 408,907 to 412,526 (+)</b>  |
| <b>GRA12DR4</b> | TCACTTGTCGTCGTCGTCCTTGTAGTCAGCGTAATCTGGAACATCGTATGGGTAAGCGTAATC<br>TGGAACATCGTATGGGTAAGCGTAATCTGGAACATCGTATGGGT <b>ACAATTCACGGTACCTGC</b><br><b>GAATGACATAG</b>  | Pru GRA12D coding+tag RP |               |                                                    |
| <b>GRA12DF4</b> | CGCTGACTACAAGGACGACGACGACAAGT <b>GATTCGGTTTTGCAAGTCGAAAGTACC</b>                                                                                                 | Pru GRA12D coding+tag FP |               |                                                    |
| <b>GRA12DR2</b> | <i>GTGAGCGGATAACAATTTACACAGGAAACAGCGCGGCCAGTCATCATGGGGAATTGTGATGGC</i>                                                                                           | Pru GRA12D 3'target RP   |               |                                                    |

\*Italicized nucleotides indicate regions of crossover in yeast recombination cloning, underlined nucleotides indicate restriction enzyme sites, and bold nucleotides indicate specific genomic priming target regions corresponding to type II ME49 in the *Toxoplasma gondii* database (ToxoDB version 30). FP indicates forward primer and RP indicates reverse primer. GRA12C replacement loci was pulled out in three parts.
