# Supplementary material for: A Family of Toxoplasma gondii Genes Related to GRA12 Regulate Cyst Burdens and Cyst Reactivation
Source: PubMed Central journal article supplement (PMC8546695; doi:10.1128/msphere.00182-21), 2021-04-21
Supplement: msphere.00182-21-st002.pdf [file msphere.00182-21-st002.pdf]

**Table S2. Primers used to validate *GRA* knockouts and complementations.**

| Primer           | Sequence                   | Primer use                                                                              |
|------------------|----------------------------|-----------------------------------------------------------------------------------------|
| 5'DHFRCXR        | ACTGCGAACAGCAGCAAGATCG     | 5' RP for validation of all GOI 5' flank integrations or for HXGPRT deletion validation |
| 3'DHFRCXF        | GTTGGCCTACGTGACTTGCTGATG   | 3' FP for validation of all GOI 3' flank integrations or for HXGPRT deletion validation |
| <b>GRA12ACXF</b> | CTGCAAGACCGCGAGCAAGC       | FP for validation of GOI 5' flank integration                                           |
| GRA12ADF         | CACGACGGCACAGAAGCAGC       | FP for GOI deletion validation                                                          |
| GRA12ADR         | CATAGTCGTGAGCTTGCCCTG      | RP for GOI deletion validation                                                          |
| GRA12ACXR        | CTGCTGGTGCCGCATGAGAC       | RP for validation of GOI 3' flank integration                                           |
| <b>GRA12BCXF</b> | CACGCAAGTCTCACCGCAGG       |                                                                                         |
| GRA12BDF         | CAGAGGTCGGTCTTACGCATGG     |                                                                                         |
| GRA12BDR         | CAGCTTGTGCCACAAGTACCACC    |                                                                                         |
| GRA12BCXR        | CGAACAGGAACGTGAGGTTCTCC    |                                                                                         |
| <b>GRA12CCXF</b> | GGCACTCCAGCAGAGAAAGCAC     |                                                                                         |
| GRA12CDF         | GTGTTCCGGTACATATGGCAGACAGC |                                                                                         |
| GRA12CDR         | GTCTATGTGCATGGATGTCAGTGCG  |                                                                                         |
| GRA12CCXR        | CAGCCTCTGCTCTTGCTGCG       |                                                                                         |
| <b>GRA12DCXF</b> | CGGTACCGACGAATCCACAGC      |                                                                                         |
| GRA12DDF         | CCGCAGGCGTACTGTTGGTAC      |                                                                                         |
| GRA12DDR         | CTGCACGTCGAGCCAGTCAC       |                                                                                         |
| GRA12DCXR        | GGACGCGTGATAGTCCGTTTC      |                                                                                         |

\*FP indicates forward primer and RP indicates reverse primer. GRA(GOI)CXF is the FP for validation of GOI 5' flank integrations, GRA(GOI)DF is the FP for GOI deletion or integration validations, GRA(GOI)DR is the RP for GOI deletion or integration validations, GRA(GOI)CXR is the RP for validation of GOI 3' flank integrations.
